# Supplementary material
Source: PubMed Central journal article supplement (PMC6512301)
Supplement: jamaoncol-5-e190339-s002.pdf [file jamaoncol-5-e190339-s002.pdf]

## Supplementary Online Content

Jackisch C, Stroyakovskiy D, Pivot X, et al. Subcutaneous vs intravenous trastuzumab for patients with ERBB2-positive early breast cancer: final analysis of the HannaH phase 3 randomized clinical trial. *JAMA Oncol*. Published online April 18, 2019.  
doi:10.1001/jamaoncol.2019.0339

### **eFigure.** CONSORT Diagram

This supplementary material has been provided by the authors to give readers additional information about their work.

## eFigure. CONSORT Diagram

### A. Trial profile for the neoadjuvant-adjuvant treatment phase

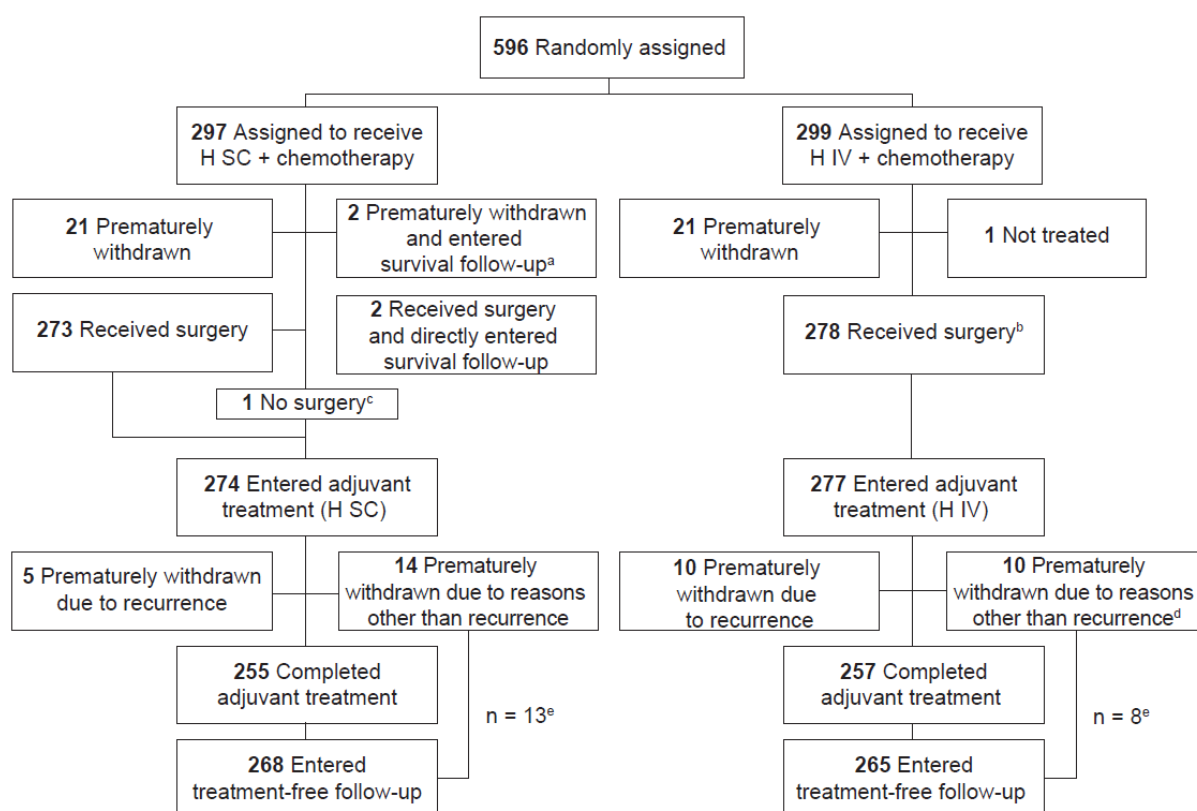

### B. Trial profile for the treatment-free follow-up phase

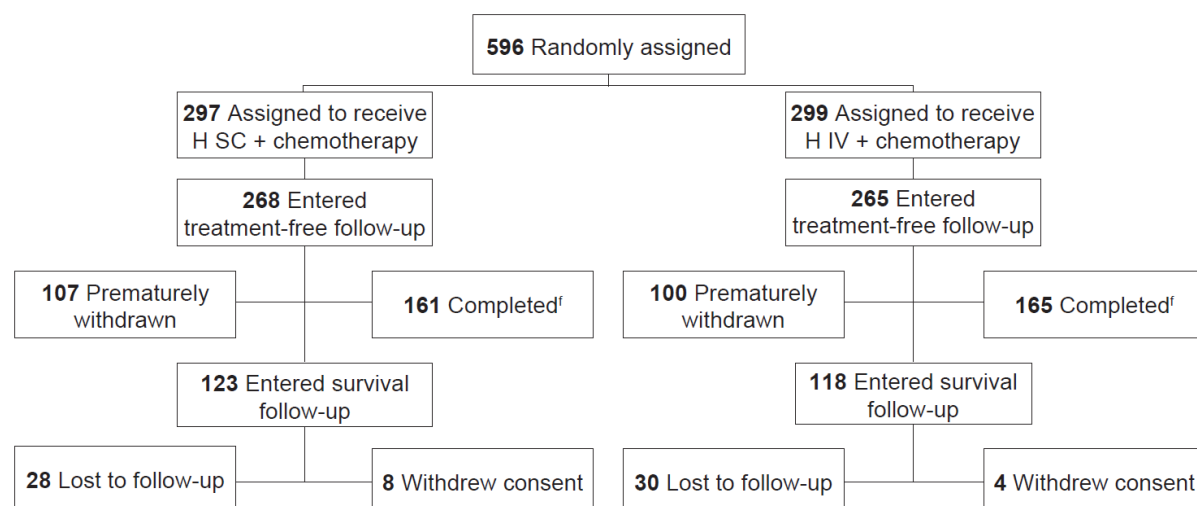

<sup>a</sup> Two patients were prematurely withdrawn due to disease progression after completion of 8 cycles of treatment but nevertheless underwent surgery and are included in the efficacy per-protocol population.

<sup>b</sup> Includes one patient who discontinued treatment at the end of the neoadjuvant phase, did not receive adjuvant treatment, and underwent surgery in the treatment-free follow-up phase.

<sup>c</sup> One patient did not undergo primary surgery after completion of the neoadjuvant phase.

<sup>d</sup> Includes one patient who withdrew due to insufficient therapeutic response.

<sup>e</sup> In the H IV arm, two patients withdrew consent. In the H SC arm, one patient withdrew consent. These patients did not enter treatment-free follow-up for event-free survival.

<sup>f</sup> Patients who consented to 5 years of follow-up under Protocol Amendment C only.

Abbreviations: H IV, intravenous trastuzumab; H SC, subcutaneous trastuzumab.

Reprinted from *Eur J Cancer*, Volume 62, Jackisch C, *et al.*, HannaH phase III randomised study: Association of total pathological complete response with event-free survival in HER2-positive early breast cancer treated with neoadjuvant–adjuvant trastuzumab after 2 years of treatment-free follow-up, Pages 62-75, © 2016, with permission from Elsevier.

<https://doi.org/10.1016/j.ejca.2016.03.087>
